# Supplementary material for: Increasing methylation of sperm rDNA and other repetitive elements in the aging male mammalian germline
Source: PubMed Central journal article supplement (PMC7431825; doi:10.1111/acel.13181), 2020-07-01
Supplement: ACEL-19-e13181-s001.pdf [file ACEL-19-e13181-s001.pdf]

**TABLE S1** Clinical parameters of the analyzed human sperm samples

| <b>Parameters</b>                    | <b>Cohort 1</b><br>Mean $\pm$ SD* [range] | <b>Cohort 2</b><br>Mean $\pm$ SD* [range] | <b>Cohort 3</b><br>Mean $\pm$ SD* [range] |
|--------------------------------------|-------------------------------------------|-------------------------------------------|-------------------------------------------|
| Sample size (N)                      | 186                                       | 109                                       | 154                                       |
| Smokers (N)                          | 11                                        | 14                                        | 16                                        |
| Donor's age (years)                  | 39.0 $\pm$ 6.4 [25.7-65.8]                | 38.9 $\pm$ 5.1 [28.1-52.9]                | 37.8 $\pm$ 5.4 [25.8-49.2]                |
| Body mass index (kg/m <sup>2</sup> ) | 25.7 $\pm$ 2.9 [19.4-36.8]                | 25.8 $\pm$ 3.4 [17.3-40.3]                | 26.3 $\pm$ 3.8 [17.5-38.7]                |
| Sperm concentration (million/ml)     | 28.6 $\pm$ 33.4 [0.2-210]                 | 38.1 $\pm$ 40.6 [0.2-200]                 | 43.2 $\pm$ 51.6 [0.5-250]                 |

\* SD = standard deviation.

**TABLE S2** PCR and pyrosequencing primers for human, mouse, bovine, and marmoset repetitive elements

| <b>Assay</b>                                     | <b>Primer</b>              | <b>Sequence (5'-3')<sup>a</sup></b> | <b>Number of CpGs</b> | <b>Annealing temperature</b> |
|--------------------------------------------------|----------------------------|-------------------------------------|-----------------------|------------------------------|
| Human rDNA upstream control element <sup>c</sup> | Forward outer <sup>b</sup> | GTGTTTTGGGGTTGATTAGAGG              |                       | 60°C                         |
|                                                  | Reverse outer <sup>b</sup> | ATCACCRATAAACCAAAACCCC              |                       |                              |
|                                                  | Forward                    | GTGTTTTGGGGTTGATTAGAGG              |                       |                              |
|                                                  | Reverse                    | *CATCCCAAACCCAACCTCTCC              |                       |                              |
|                                                  | Sequencing 1               | GGTTGATTAGAGGGTT                    | 5                     |                              |
|                                                  | Sequencing 2               | TTTTGGGGATAGGTG                     | 13                    |                              |
|                                                  | Sequencing 3               | TTYGGGGGAGGTATATTTT                 | 8                     |                              |
| Human rDNA promoter <sup>d</sup>                 | Forward outer <sup>b</sup> | GGTAGTTGTYGAGGGAGGGG                |                       | 60°C                         |
|                                                  | Reverse outer <sup>b</sup> | AAAAAAACRTCCCCAACCTCC               |                       |                              |
|                                                  | Forward                    | GTTTTYGTTGTGAGTTAGGTAGAGTTT         |                       | 60°C                         |
|                                                  | Reverse                    | *AAAAAAACRTCCCCAACCTCC              |                       |                              |
|                                                  | Sequencing                 | GGTTTATGTGGGGGAGAGGTTGT             | 9                     |                              |
| Human, mouse, bovine, and marmoset 18S rDNA      | Forward                    | AGGTTTGTGATGTTTTTAGATGT             |                       | 60°C                         |
|                                                  | Reverse                    | *AAAACCTCACTAAACCATC                |                       |                              |
|                                                  | Sequencing 1               | TTTGTGATGTTTTTAGATGTT               | 4                     |                              |
|                                                  | Sequencing 2               | ATTAAGTTTTTGTTTTTTGTATATA           | 4                     |                              |
| Human, mouse, bovine, and marmoset 28S rDNA      | Forward                    | GGTTTTAAGTAGGAGGTGTTAGAAAAG         |                       | 60°C                         |
|                                                  | Reverse                    | *CAACCAAACACATACCAAATATCT           |                       |                              |
|                                                  | Sequencing 1               | GGATAATTGGTTTGTGG                   | 7                     |                              |
|                                                  | Sequencing 2               | GTTGGATTGTTTATTTATTAATAGG           | 3                     |                              |

|                                               |              |                                         |   |      |
|-----------------------------------------------|--------------|-----------------------------------------|---|------|
| Human<br>$\alpha$ -satellite DNA              | Forward      | *TGTAAGTGGATATTTGGATTATTGG              |   | 57°C |
|                                               | Reverse      | AACAATTTCAAAACTACTCCATCAA               |   |      |
|                                               | Sequencing   | CTCAAAAATTTCTAAAAATACTTCTC              | 4 |      |
| Human<br>LINE1                                | Forward      | TTTTGAGTTAGGTGTGGGATA                   |   | 60°C |
|                                               | Reverse      | *CTCACTAAAAAATACCAAACAA                 |   |      |
|                                               | Sequencing   | GTTAGGTGTGGGATATAGTT                    | 4 |      |
| Human<br>ALU <sup>c</sup>                     | Forward      | GGGACACCGCTGATCGTATATTTTTATTAAAAATATAAA |   | 52°C |
|                                               | Reverse      | CCAAACTAAAATACAATAA                     |   |      |
|                                               | Universal    | *GGGACACCGCTGATCGTATA                   |   |      |
|                                               | Sequencing   | AATAACTAAAATTACAAAC                     | 3 |      |
|                                               |              |                                         |   |      |
| Mouse<br>rDNA spacer<br>promoter <sup>f</sup> | Forward      | GGAGAAGTGGTGGGTGGG                      |   | 60°C |
|                                               | Reverse      | *CTCCTATATCACCAACCTAAAAACCT             |   |      |
|                                               | Sequencing 1 | AGTGGTGGGTGGGTA                         | 5 |      |
|                                               | Sequencing 2 | AGTGAGTGAATGTGG                         | 4 |      |
|                                               | Sequencing 3 | ATTGGTTTGTATGGTTGA                      | 3 |      |
|                                               | Sequencing 4 | GATATTTAGTGGTGATAAGTTT                  | 2 |      |
| Mouse<br>rDNA core<br>promoter <sup>f</sup>   | Forward      | TTGGGGAGGTGGTTTAAAAATGA                 |   | 60°C |
|                                               | Reverse      | *CCTCCAAAACCTCTCTAT                     |   |      |
|                                               | Sequencing 1 | GAGGTGGTTTAAAAATGAT                     | 2 |      |
|                                               | Sequencing 2 | GGATTTTAAAGGAATAATTGGT                  | 3 |      |
|                                               | Sequencing 3 | GATAGGTTAATGAAAGAAAA                    | 2 |      |
| Mouse<br>minor satellite<br>DNA               | Forward      | *AAATTATATTGGAGAATAGATTAGATGAGT         |   | 58°C |
|                                               | Reverse      | TCCTTATTACTTTCCTCATTAATATACT            |   |      |
|                                               | Sequencing   | ACACTATTCTACAAATCCC                     | 2 |      |

|                                  |              |                               |   |      |
|----------------------------------|--------------|-------------------------------|---|------|
| Mouse major satellite DNA        | Forward      | *TGTGTGTGTATTTATTTTGGAAAGAA   |   | 58°C |
|                                  | Reverse      | AACATTTCTAAATATTCCACCTTTTTC   |   |      |
|                                  | Sequencing   | CAATATACATTTCTCATTTTTCAC      | 3 |      |
| Mouse LINE1 T <sup>g</sup>       | Forward      | *GGTTGGGGAGGYGGTTTAAGTTATA    |   | 60°C |
|                                  | Reverse      | CTACCTATTCCAAAACTATCAAATTCTT  |   |      |
|                                  | Sequencing 1 | AATCCCAAACCAAATA              | 2 |      |
|                                  | Sequencing 2 | CCTATTCAAATAATTTCTCTAAA       | 2 |      |
| Bovine alpha-satellite DNA       | Forward      | TGTTTTGTTTGGGAAGGGGTTT        |   | 58°C |
|                                  | Reverse      | *AACTATATTTAAAACCAAAAATTTTCC  |   |      |
|                                  | Sequencing 1 | GTTTGGGAAGGGGTTT              | 3 |      |
|                                  | Sequencing 2 | GTGGGTGGTTTATATT              | 3 |      |
|                                  | Sequencing 3 | GGTTTTTTTTGATAAGAATT          | 3 |      |
|                                  | Sequencing 4 | GAAGGGGTAGTTTT                | 3 |      |
| Bovine testis satellite DNA      | Forward      | TTGGGTTTGGTGTATTGGAAGA        |   | 58°C |
|                                  | Reverse      | *ACTCCACCCCTATAAATAACAAT      |   |      |
|                                  | Sequencing 1 | GTAGGGTATTTTGTATTTAGA         | 2 |      |
|                                  | Sequencing 2 | GGGTTGAGGTATGGAA              | 5 |      |
|                                  | Sequencing 3 | GGAATTTGGGGTTTTTT             | 2 |      |
| Marmoset $\alpha$ -satellite DNA | Forward      | GGTTTTTTTAGGAGTTGGAT          |   | 57°C |
|                                  | Reverse      | *AAAATTTCCAATAATTTCTTAAATACCT |   |      |
|                                  | Sequencing 1 | GGGTGAATTGGAATAA              | 2 |      |
|                                  | Sequencing 2 | TGAGAAATATTTGTTTTTAAAATTA     | 2 |      |
|                                  | Sequencing 3 | GGTTTTTAATGTGTGTATTTAATTT     | 1 |      |

<sup>a</sup> Primers indicated by a star are biotinylated at the 5' end.

<sup>b</sup> Outer primers for nested PCR are only necessary, when working with very small amounts of DNA (equivalent to 10 sperm).

Primers adopted from the literature.

<sup>c</sup> Raval, A., Sridhar, K. J., Patel, S., Turnbull, B. B., Greenberg, P. L., & Mitchell, B.S. (2012). Reduced rRNA expression and increased rDNA promoter methylation in CD34+ cells of patients with myelodysplastic syndromes. *Blood*, *120*, 4812-4818.

<sup>d</sup> Teschler, S., Gotthardt, J., Dammann, G., & Dammann, R.H. (2016). Aberrant DNA methylation of rDNA and PRIMA1 in borderline personality disorder. *International Journal of Molecular Sciences*, *17*, E67.

<sup>e</sup> Yang, A. S., Estécio, M. R., Doshi, K., Kondo, Y., Tajara, E. H., & Issa, J. P. (2004). A simple method for estimating global DNA methylation using bisulfite PCR of repetitive DNA elements. *Nucleic Acids Research*, *32*, e38.

<sup>f</sup> Shiao, Y. H., Leighty, R. M., Wang, C., Ge, X., Crawford, E. B., Spurrier, J. M., ... Anderson, L.M. (2012). Ontogeny-driven rDNA rearrangement, methylation, and transcription, and paternal influence. *PloS One*, *6*, e22266.

<sup>g</sup> Walter, M., Teissandier, A., Pérez-Palacios, R., & Bourc'his, D. (2016). An epigenetic switch ensures transposon repression upon dynamic loss of DNA methylation in embryonic stem cells. *Elife*, *5*, e11418.





|       |      |         |  |  |  |  |
|-------|------|---------|--|--|--|--|
| CpG14 | 0.50 | <0.0001 |  |  |  |  |
| CpG15 | 0.53 | <0.0001 |  |  |  |  |
| CpG16 | 0.50 | <0.0001 |  |  |  |  |
| CpG17 | 0.46 | <0.0001 |  |  |  |  |
| CpG18 | 0.50 | <0.0001 |  |  |  |  |
| CpG19 | 0.39 | <0.0001 |  |  |  |  |
| CpG20 | 0.27 | 0.008   |  |  |  |  |
| CpG21 | 0.23 | 0.028   |  |  |  |  |
| CpG22 | 0.27 | 0.008   |  |  |  |  |
| CpG23 | 0.28 | 0.006   |  |  |  |  |
| CpG24 | 0.49 | <0.0001 |  |  |  |  |
| CpG25 | 0.52 | <0.0001 |  |  |  |  |
| CpG26 | 0.45 | <0.0001 |  |  |  |  |



**TABLE S4** Primers for deep bisulfite sequencing of human rDNA

| Assay                                                      | Primer             | Sequence (5'-3')*                                                                                                                                                                                                                                                                 | Amplicon length | Variant | Number of CpGs | Annealing temperature |
|------------------------------------------------------------|--------------------|-----------------------------------------------------------------------------------------------------------------------------------------------------------------------------------------------------------------------------------------------------------------------------------|-----------------|---------|----------------|-----------------------|
| rDNA region 1 (external transcribed spacer)                | Forward            | GGAGTTAGYGGGGTGGGGTTGT                                                                                                                                                                                                                                                            | 272 bp          | A/G     | 38             | 56°C                  |
|                                                            | Reverse            | ACTAAAAAATTAACCTCC                                                                                                                                                                                                                                                                |                 |         |                |                       |
|                                                            | Amplified sequence | GGAGCCAGCGGGGTGGGGTTGTCGCGGGCCGCCCGGGCGCCCGCAGCGGAGAGCGCACGGGGGCACGGTG GCCCTCGCCGCTTCCCCGCCGCCCGGGTGGGTGAGAGACCCGGACCCGGGCCGGCACCGGGAGTCGGG ACGCTCGGACGCGCGAGAGAA/GCAGCAGGCCCGCGGGCCCGGCAGGCGGCTCAAGCAGGAGCGCGGCC GGCTAGCCGGGTCACCGGTAGGCCAGAGCCCCGCGCGCATCCGGAGGCCCAACCTCTCCAGCG |                 |         |                |                       |
| rDNA region 2 (upstream control element and core promoter) | Forward            | TATTYGGAGGTTTAATTTTTTTAG                                                                                                                                                                                                                                                          | 235 bp          | A/G     | 25             | 56°C                  |
|                                                            | Reverse            | TATATCCTAAAATTAACCAAAAAACCCC                                                                                                                                                                                                                                                      |                 |         |                |                       |
|                                                            | Amplified sequence | GGAGGCCCAACCTCTCCAGCGACAGGTCGCCAGAGGACAGCGTGTCAGCAATAACCCGGCGGCCCAAAAT GCCGACTCGGAGCGAAAGATATACCTCCCCGGGGCCGGGAGGTCGCGTCACCGACCACGCCGCCGGCCC AGGCA/GACGCGCGACACGGACACCTGTCCCCAAAAACGCCACCATCGCAGCCACACACGGAGCGCCCGGG GCCCTCTGGTCAACCCCAGGACACAC                                   |                 |         |                |                       |

\* The A/G variant in the amplified sequence is underlined.

**TABLE S5** Correlations between donor's age and mean repeat methylation in different animal models

| <b>Region</b>                             | <b>CpG number</b> | <b>Correlation coefficient</b> | <b><i>p</i> value</b> |
|-------------------------------------------|-------------------|--------------------------------|-----------------------|
| <b><i>Mus musculus</i></b> (N = 80)       |                   |                                |                       |
| rDNA spacer promoter                      | 14                | Pearson's r = 0.19             | 0.09                  |
| rDNA core promoter                        | 7                 | Pearson's r = 0.23             | 0.044                 |
| 18S rDNA                                  | 8                 | Pearson's r = 0.25             | 0.024                 |
| 28S rDNA                                  | 10                | Pearson's r = 0.36             | 0.001                 |
| Mouse minor satellite                     | 2                 | Pearson's r = 0.57             | < 0.0001              |
| Mouse major satellite                     | 3                 | Pearson's r = 0.24             | 0.037                 |
| Mouse LINE1-T                             | 4                 | Pearson's r = 0.27             | 0.016                 |
| <b><i>Bos taurus</i></b> (N = 36)*        |                   |                                |                       |
| 18S rDNA                                  | 8                 | Spearman's rho = 0.45          | 0.006                 |
| 28S rDNA                                  | 10                | Spearman's rho = 0.32          | 0.058                 |
| Bovine alpha-satellite                    | 12                | Spearman's rho = 0.62          | < 0.0001              |
| Bovine testis satellite I                 | 9                 | Spearman's rho = 0.76          | < 0.0001              |
| <b><i>Callithrix jacchus</i></b> (N = 16) |                   |                                |                       |
| 18S rDNA                                  | 8                 | Spearman's rho = 0.02          | 0.9                   |
| 28S rDNA                                  | 10                | Spearman's rho = 0.22          | 0.4                   |
| $\alpha$ -satellite DNA                   | 5                 | Spearman's rho = 0.63          | 0.009                 |

\* Including samples from 9 bulls at three different ages and 3 bulls at two different ages.

**TABLE S6** Sperm methylation of orthologous regions in 18S and 28S rDNA in four analyzed species

|                   | <b>Methylation (%)</b><br>Mean $\pm$ SD <sup>a</sup> [range] | <b>Methylation increase (%)</b><br><b>in 10% of lifespan<sup>b</sup></b> |
|-------------------|--------------------------------------------------------------|--------------------------------------------------------------------------|
| <b>18S rDNA</b>   |                                                              |                                                                          |
| Human (N = 295)   | 14.2 $\pm$ 3.4 [8.1-26.4]                                    | 1.83                                                                     |
| Marmoset (N = 16) | 22.1 $\pm$ 6.9 [10.3-36.9]                                   | 0.25                                                                     |
| Bovine (N = 36)   | 5.8 $\pm$ 2.0 [2.8-12.1]                                     | 0.35                                                                     |
| Mouse (N = 80)    | 18.1 $\pm$ 3.3 [11.5-27.3]                                   | 0.81                                                                     |
| <b>28S rDNA</b>   |                                                              |                                                                          |
| Human (N = 295)   | 11.5 $\pm$ 2.8 [5.7-21.4]                                    | 1.73                                                                     |
| Marmoset (N = 16) | 18.2 $\pm$ 4.7 [10.6-27.8]                                   | 0.49                                                                     |
| Bovine (N = 36)   | 8.1 $\pm$ 2.1 [4.5-12.3]                                     | 0.41                                                                     |
| Mouse (N = 80)    | 15.5 $\pm$ 3.6 [8.2-25.1]                                    | 1.28                                                                     |

<sup>a</sup> SD = standard deviation.

<sup>b</sup> Lifespan is 80 years for humans, 12 years for marmoset, 20 year for bull, and 28 months for mouse.

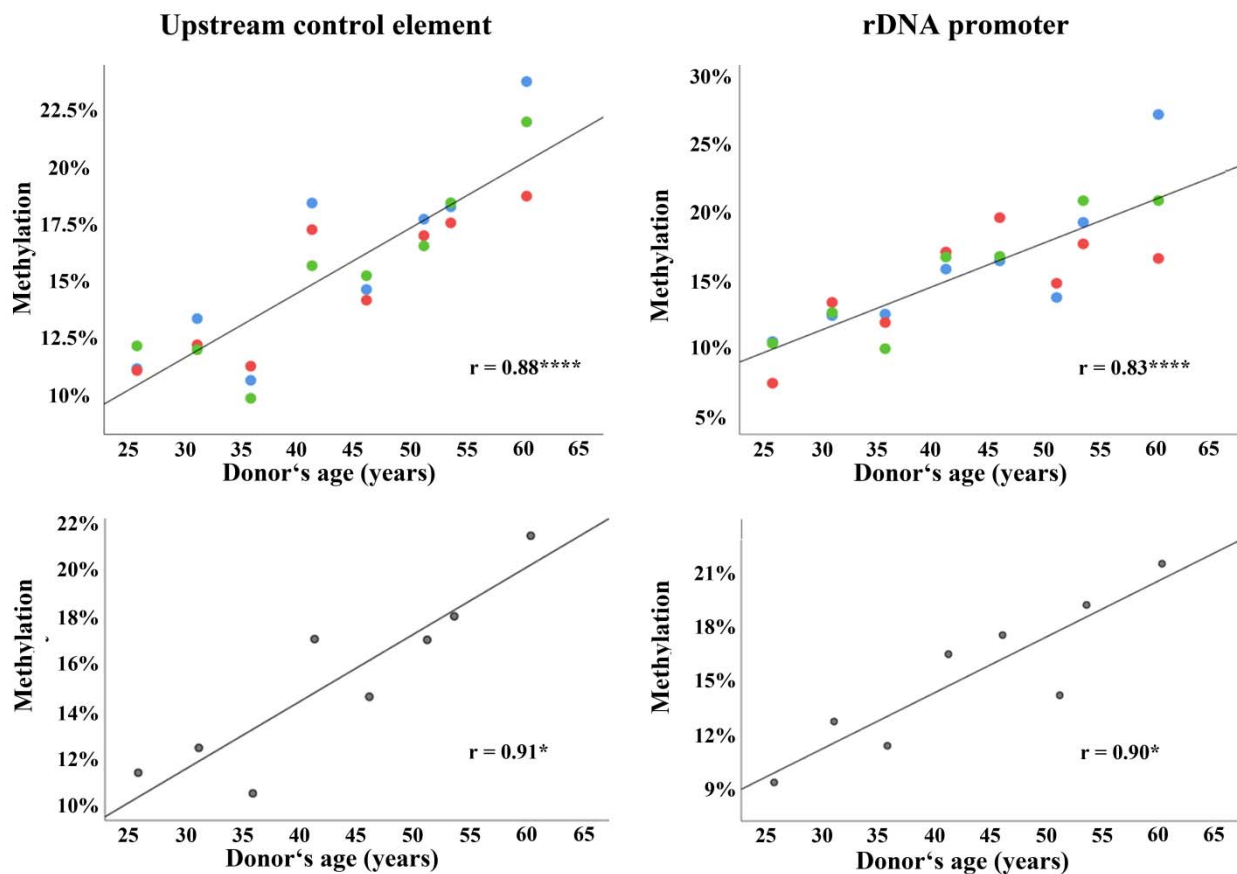

**FIGURE S1** rDNA methylation analysis of DNA aliquots equivalent to 10 human sperm. Scatter plots show the correlation between donor's age (x-axis in years) and mean methylation (y-axis in %) of the UCE (26 CpGs) and rDNA promoter (9 CpGs). DNA aliquots of 8 donors covering an age range from 25 to 60 years with 5-year gaps were analyzed by bisulfite pyrosequencing in triplicates. The blue, green and red dots in the upper diagrams represent the three measurements for each sample; the black dots in the lower diagrams represent the mean of triplicate measurements. Pearson's correlations were used for statistical analysis of the 24 measurements as well as for the means of 8 triplicates. \*\*\*\* indicates  $p < 0.0001$  and \*  $p < 0.02$ .

# CpG

1 2 3 4 5 6 7 8 9 10 11 12 13 14 15 16 17 18 19 20 21 22 23 24 25 26 27 28b 29 30 31 32 33 34 35 36 37 38

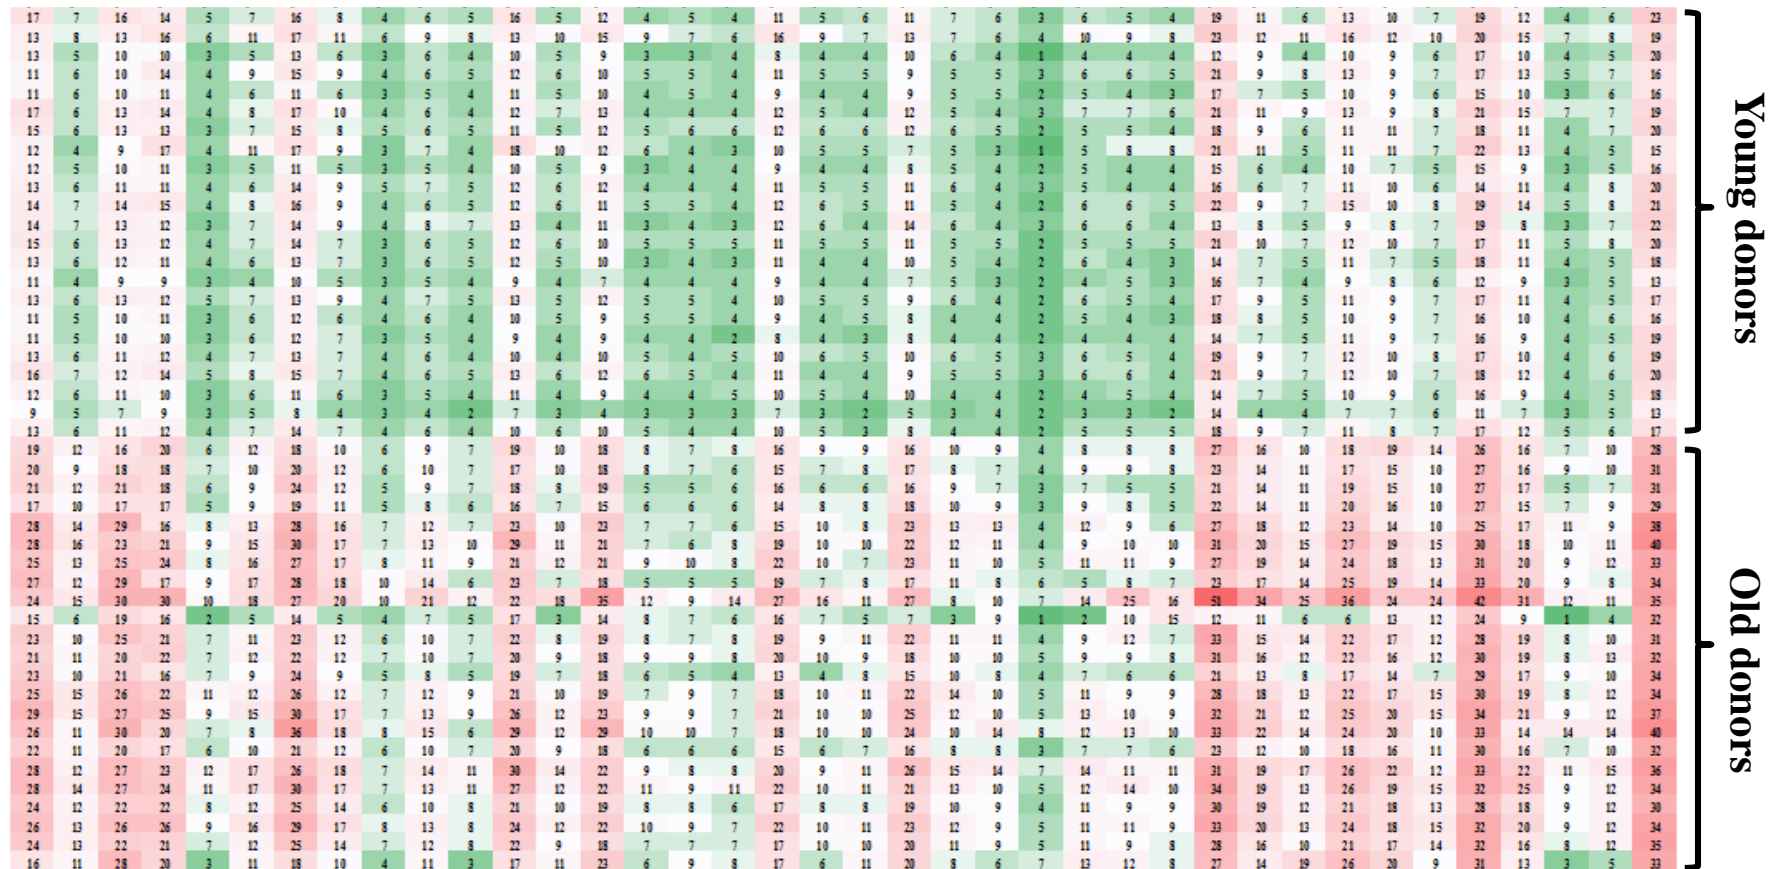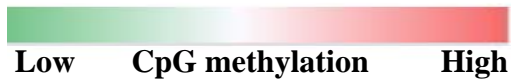

**FIGURE S2A** Single CpG methylation of the A variant of human rDNA region 1 (in the external transcribed spacer). Each row on the y-axis represents an individual sperm sample, 23 from young donors and 23 from old donors. The x-axis represents CpGs 1-38. The number within each box indicates the methylation percentage of a given CpG in a given sample, determined by deep bisulfite sequencing.

# CpG

1 2 3 4 5 6 7 8 9 10 11 12 13 14 15 16 17 18 19 20 21 22 23 24 25 26 27 28b 29 30 31 32 33 34 35 36 37 38

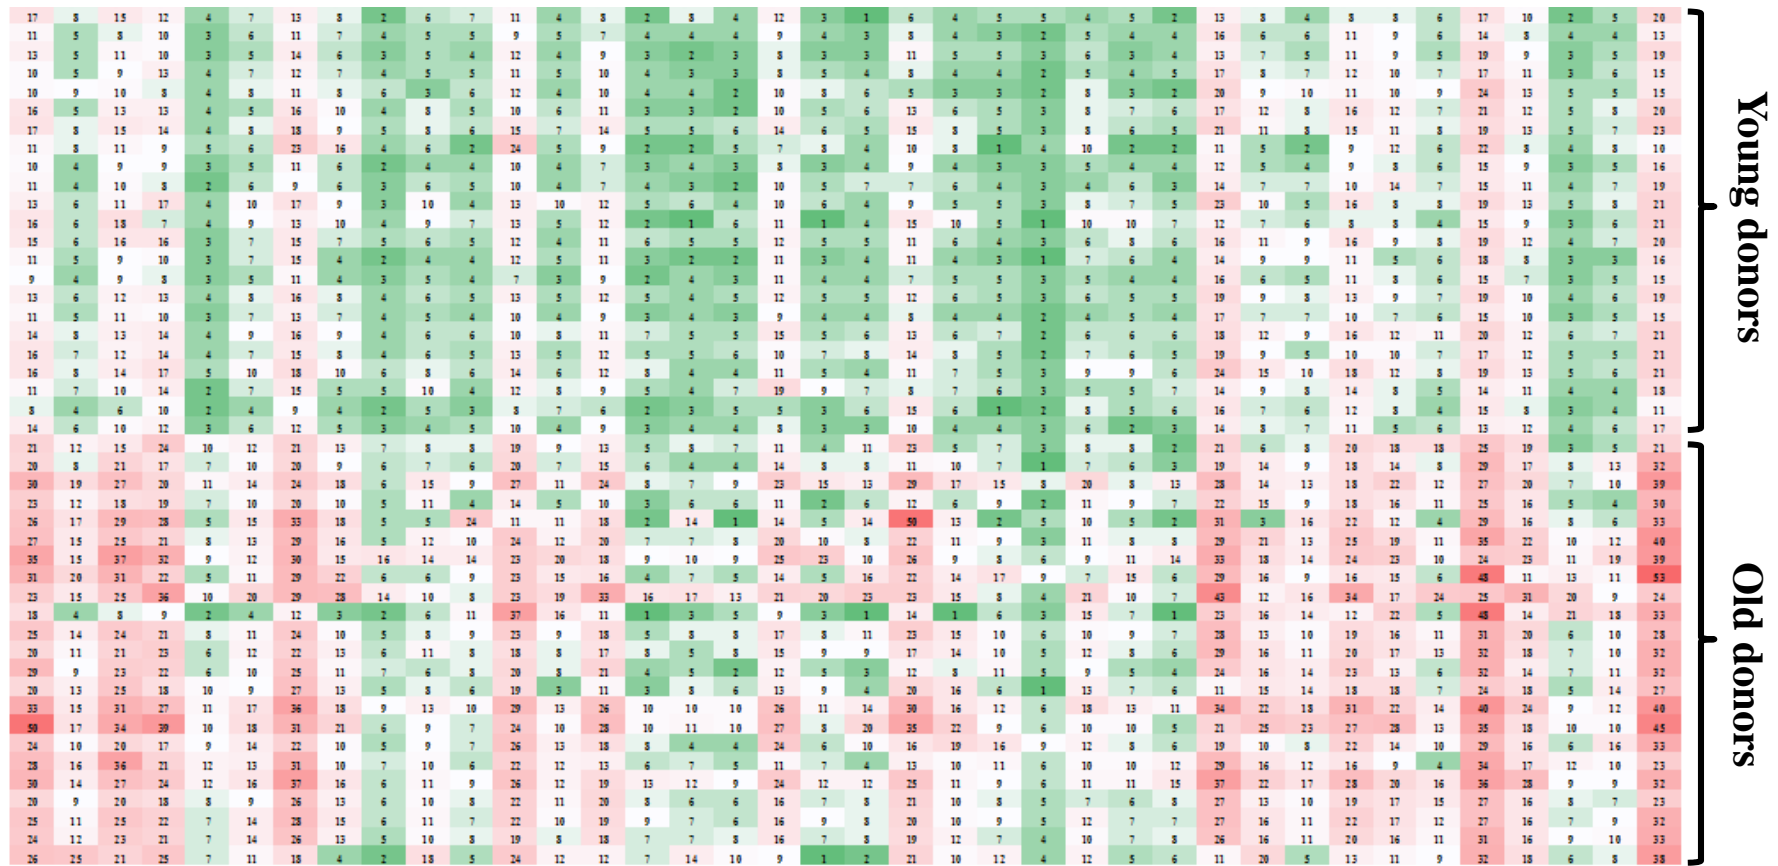

Low CpG methylation High

**FIGURE S2B** Single CpG methylation of the G variant of human rDNA region 1 (in the external transcribed spacer). Each row on the y-axis represents an individual sperm sample, 23 from young donors and 23 from old donors. The x-axis represents CpGs 1-38. The number within each box indicates the methylation percentage of a given CpG in a given sample, determined by deep bisulfite sequencing.

# CpG

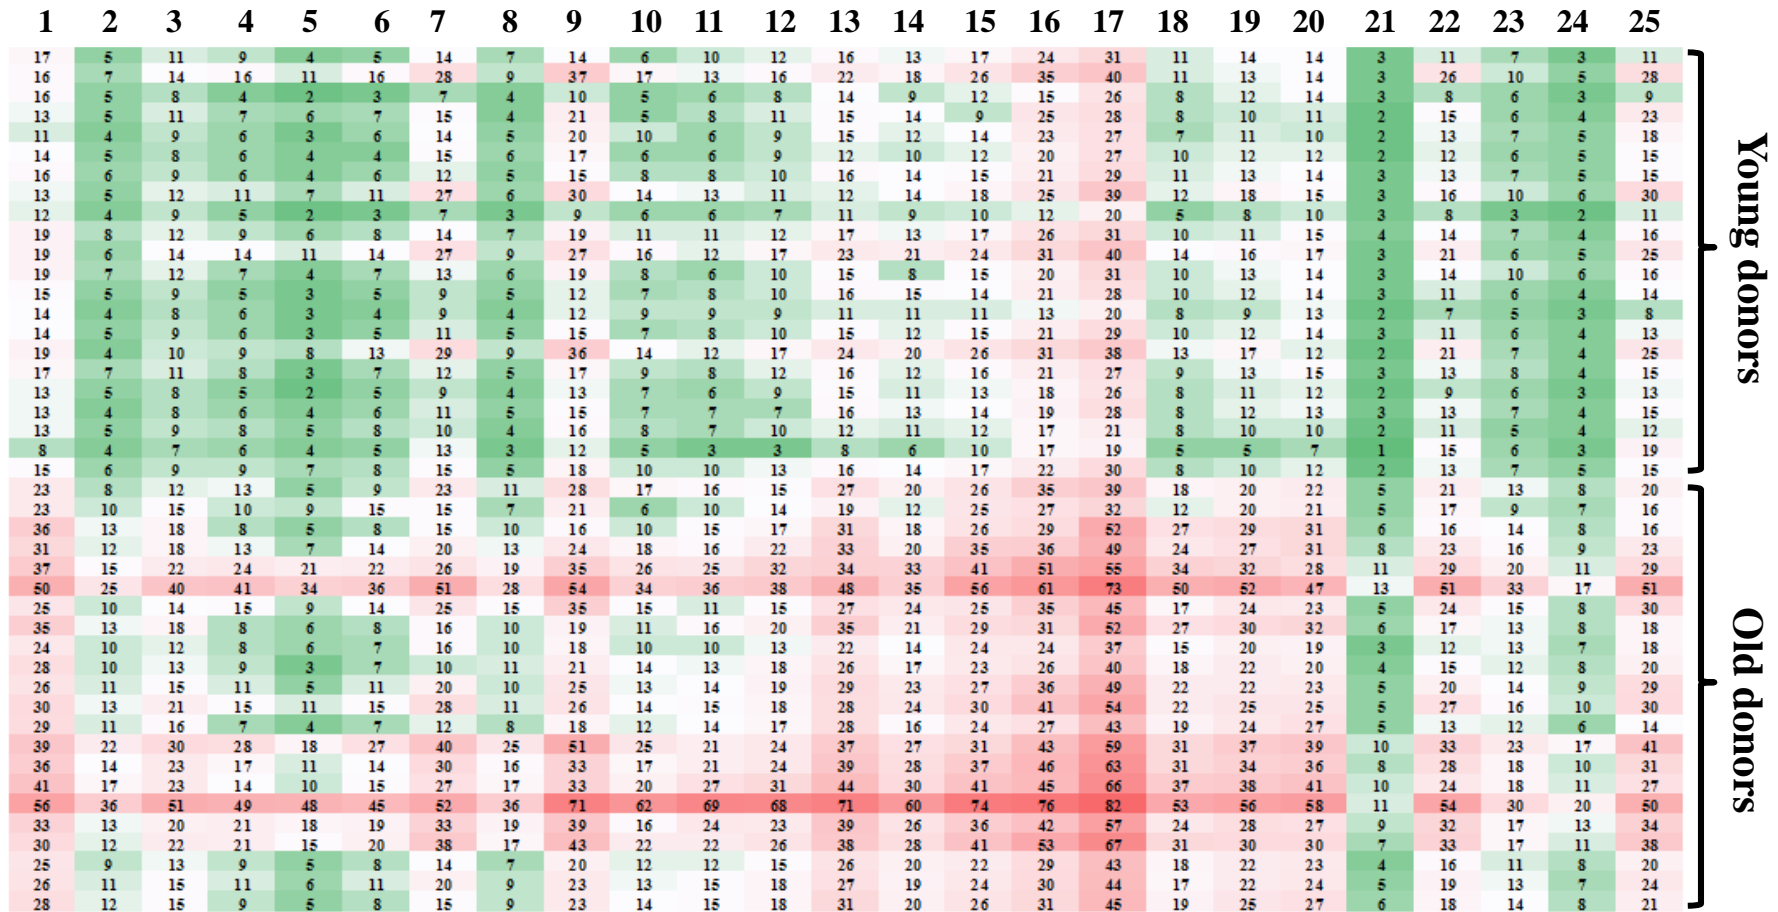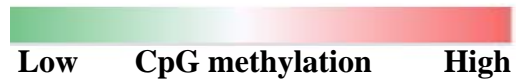

**FIGURE S2C** Single CpG methylation of the A variant of human rDNA region 2 (in the upstream control element and core promoter). Each row on the y-axis represents an individual sperm sample, 23 from young donors and 23 from old donors. The x-axis represents CpGs 1-25. The number within each box indicates the methylation percentage of a given CpG in a given sample, determined by deep bisulfite sequencing.

# CpG

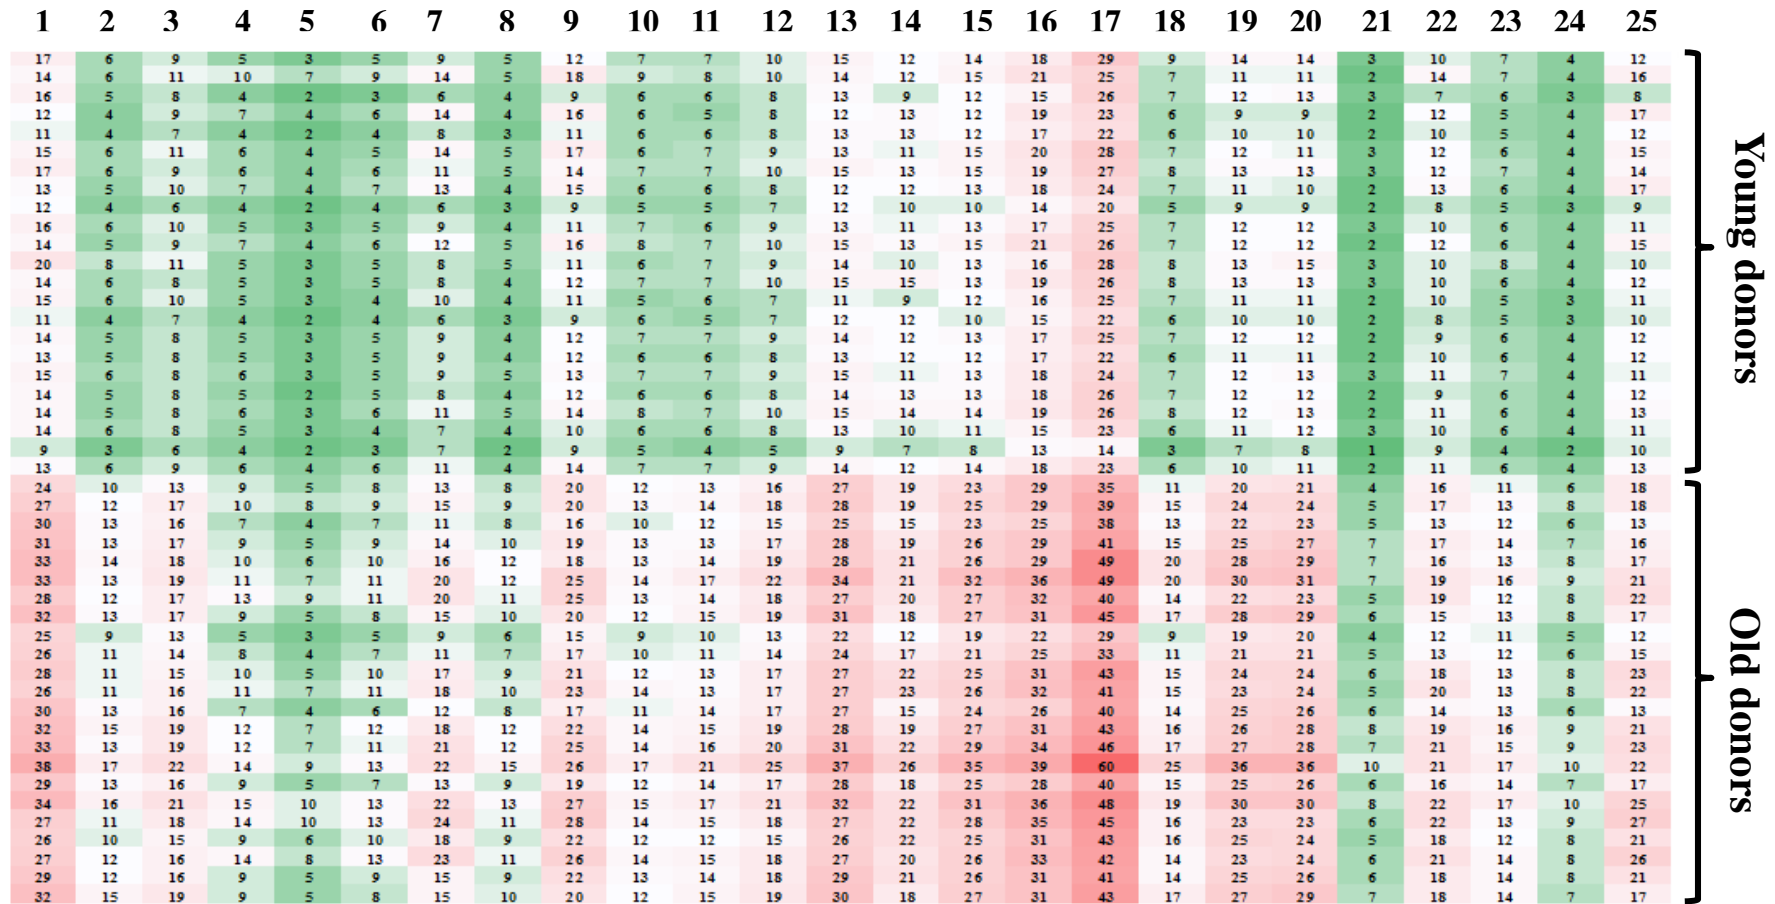

**FIGURE S2D** Single CpG methylation of the G variant of human rDNA region 2 (in the upstream control element and core promoter). Each row on the y-axis represents an individual sperm sample, 23 from young donors and 23 from old donors. The x-axis represents CpGs 1-25. The number within each box indicates the methylation percentage of a given CpG in a given sample, determined by deep bisulfite sequencing.



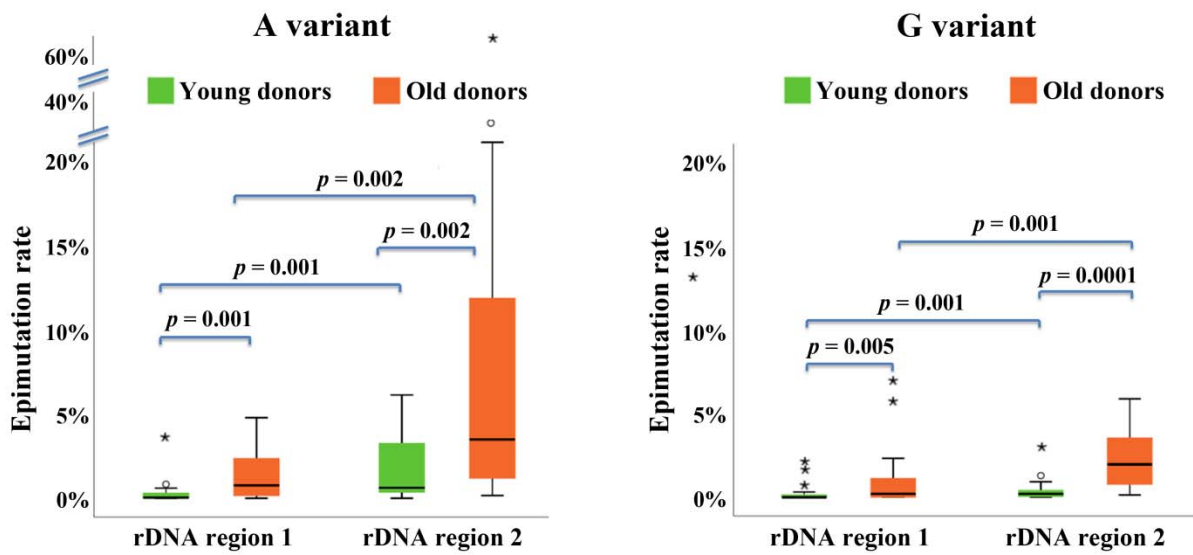

**FIGURE S3** Box plots presenting the epimutation rates (ERs) of alleles carrying the A versus the G variant in rDNA regions 1 (representing the external transcribed spacer) and 2 (upstream control element and core promoter). The bottom and the top of the box represent the 25<sup>th</sup> and 75<sup>th</sup> percentile, respectively. The median is represented by a horizontal line. Bars extend from the boxes to at most 1.5 times the height of the box. Outliers are indicated by an open circle and extreme outliers by a star symbol. The  $p$  values indicate significant differences of the ERs between 23 young versus 23 old donors and between rDNA region 1 versus 2, respectively. Mann-Whitney U tests were used for group comparisons.

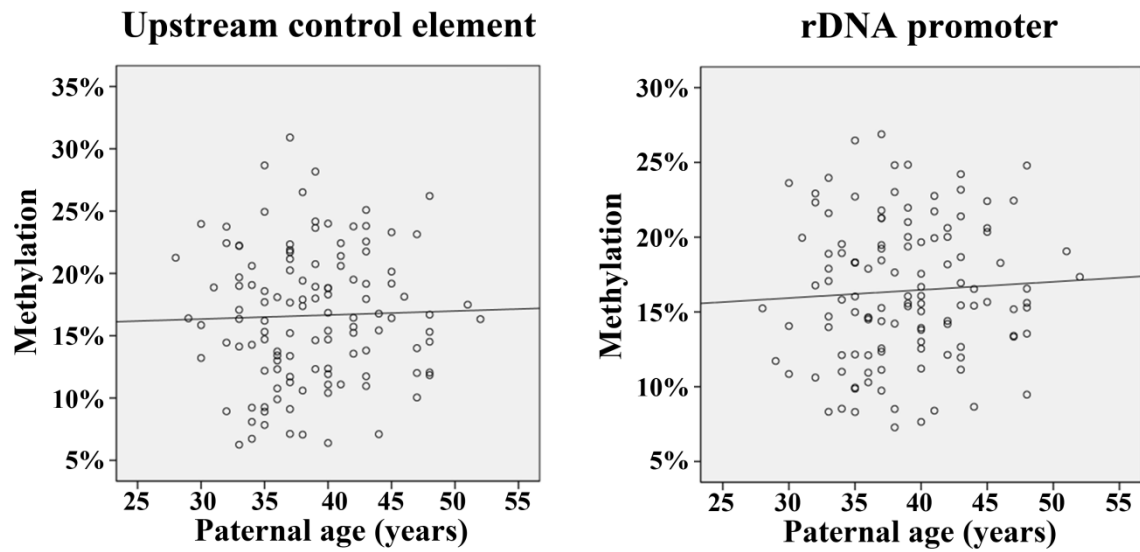

**FIGURE S4** Methylation of the rDNA upstream control element (UCE) and promoter in human fetal cord blood. Each dot represents one of 121 cord blood samples. The y-axis indicates mean methylation (in %) of 26 CpG and 9 CpG sites in the UCE and promoter, respectively. The x-axis indicates the age of the father (in years) at conception. There is no significant correlation (Pearson's  $r = 0.01$ ;  $p = 0.92$  and  $r = 0.06$ ;  $p = 0.53$ , respectively) between cord blood rDNA methylation and paternal age.

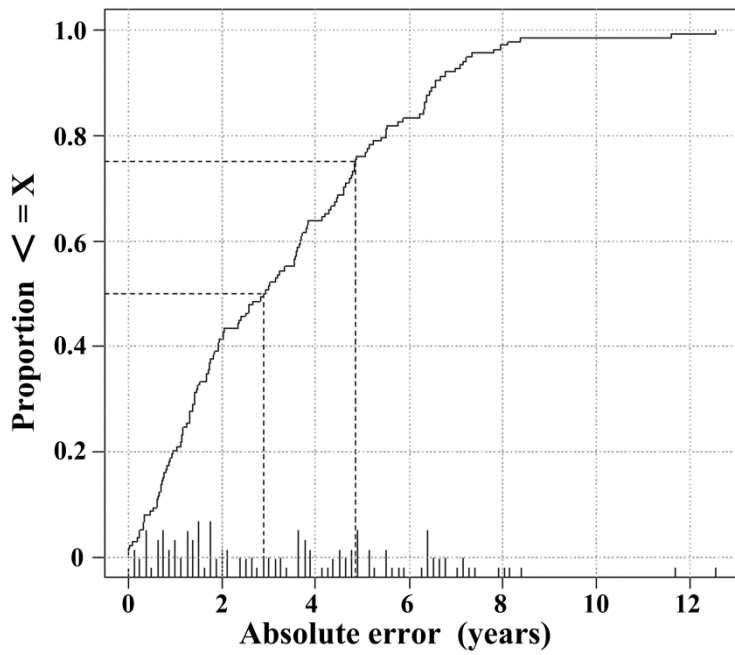

| Quantile | Absolute error |
|----------|----------------|
| 0%       | 0.001          |
| 5%       | 0.310          |
| 10%      | 0.607          |
| 15%      | 0.758          |
| 20%      | 0.981          |
| 25%      | 1.252          |
| 30%      | 1.430          |
| 35%      | 1.726          |
| 40%      | 1.923          |
| 45%      | 2.401          |
| 50%      | 2.911          |
| 55%      | 3.413          |
| 60%      | 3.693          |
| 65%      | 4.202          |
| 70%      | 4.610          |
| 75%      | 4.852          |
| 80%      | 5.469          |
| 85%      | 6.308          |
| 90%      | 6.570          |
| 95%      | 7.242          |
| 100%     | 12.546         |

**FIGURE S5** Distribution of absolute error in the test data set. In total 154 test samples were analyzed. The cumulative distribution (i.e. the fraction of values  $\leq x$ ) is plotted on the y-axis versus the absolute error in years on the x-axis. Reference lines (dotted) are given for the 50% and 75% quantiles.

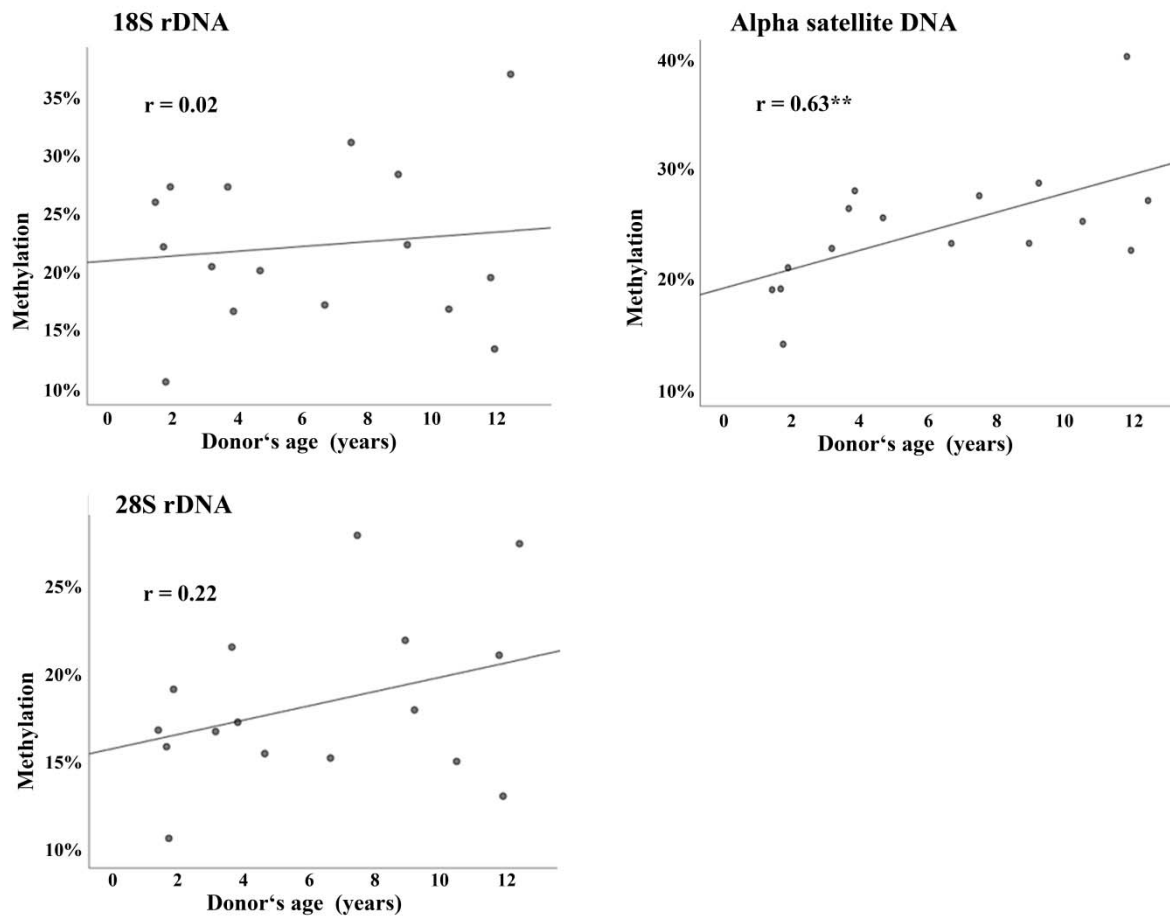

**FIGURE S6** Repeat methylation in marmoset sperm increases with donor's age. Scatter plots show positive correlations between donor's age (x-axis in years) and mean methylation (y-axis in %) of 18S rDNA (8 CpGs), 28S rDNA (10 CpGs), and  $\alpha$ -satellite DNA (5 CpGs) in marmoset sperm (N = 16). Spearman's correlations were used for statistical analysis of bisulfite pyrosequencing data. \*\* indicates  $p < 0.01$ .

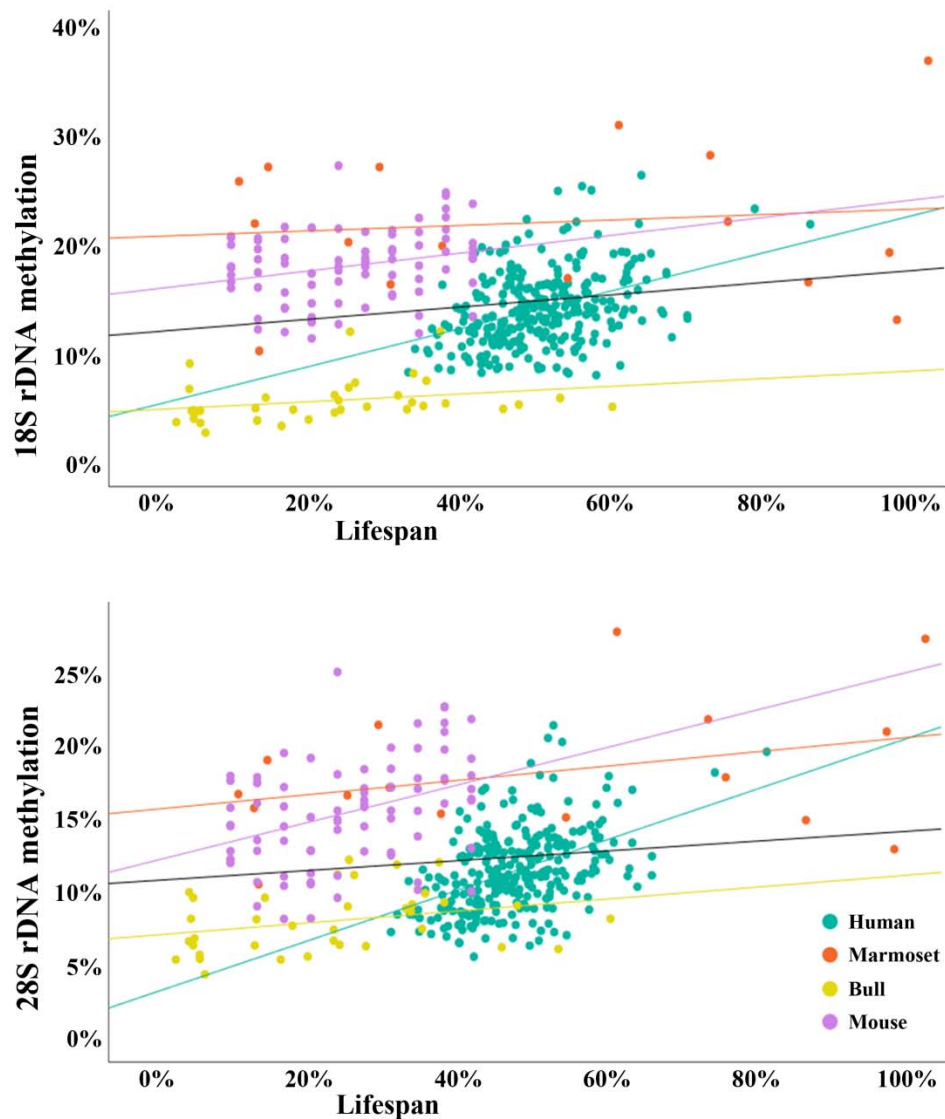

**FIGURE S7** Evolutionary conservation of the paternal age effect on sperm methylation of orthologous rDNA regions. Scatter plots show positive correlations between donor's age (x-axis in percentage of lifespan) and mean methylation (y-axis in %) of 18S rDNA (8 CpGs) and 28S rDNA (10 CpGs), respectively, in 80 mouse (purple dots), 36 bull (yellow), 16 marmoset (red), and 295 human (green) sperm samples. Mean methylation of all 427 analyzed samples (indicated by the black regression lines) significantly increased with donor's age (Pearson's  $r = 0.20$ ;  $p < 0.0001$  for 18S and  $r = 0.13$ ;  $p < 0.01$  for 28S rDNA).
